# Supplementary material for: Examining the correlation between quantifiable SVOCs and organic carbon content or particulate size in benthic sediments as a function of ocean stratum
Source: Royal Society of Chemistry journal article supplement (doi:10.1039/c9em00555b), 2020-01-01
Supplement: c9em00555b1.pdf [file c9em00555b1.pdf]

# Examining the correlation between quantifiable SVOCs and organic carbon content or particulate size in benthic sediments as a function of ocean stratum

Ochan Otim\*

*Environmental Monitoring Division, City of Los Angeles, 12000 Vista Del Mar, Playa Del Rey, CA. 90293*

\* *Corresponding author* Tel.: +1 310 648 5835; fax: +1 310 648 5828. *E-mail address:* ochan.otim@lacity.org

Author ORCID: 0000-0001-7272-4356

KEYWORDS: DDT, PAH, PCB, sediments, particle size, Santa Monica Bay

**Supplemental Material Table S1.** Sampling sites descriptions, number of days sediment samples were stored in refrigerator, and the fine grain percentage of the sediment.

| Station Identity | Latitude (Dec Deg) | Longitude (Dec Deg) | GIS Depth (m) | Stratum       | Region              |
|------------------|--------------------|---------------------|---------------|---------------|---------------------|
| 9259             | 33.8324            | -118.6488           | -678.08       | Lower Slope   | Santa Monica Basin  |
| 9263             | 33.848             | -118.5679           | -83.27        | Mid Shelf     | Santa Monica Bay    |
| 9266             | 33.8604            | -118.4481           | -63.11        | Mid Shelf     | Santa Monica Bay    |
| 9267             | 33.8608            | -118.5592           | -77.72        | Mid Shelf     | Santa Monica Bay    |
| 9277             | 33.9186            | -118.5634           | -182.53       | Canyon Bottom | Santa Monica Canyon |
| 9281             | 33.921             | -118.6501           | -448.18       | Canyon Bottom | Santa Monica Canyon |
| 9285             | 33.9348            | -118.5532           | -100.27       | Canyon Bottom | Santa Monica Canyon |
| 9287             | 33.9355            | -118.5921           | -204.10       | Outer Shelf   | Santa Monica Bay    |
| 9292             | 33.9437            | -118.5198           | -49.84        | Mid Shelf     | Santa Monica Bay    |
| 9303             | 33.9625            | -118.4762           | -18.00        | Inner Shelf   | Santa Monica Bay    |
| 9305             | 33.9662            | -118.8117           | -564.27       | Canyon Bottom | Dume Canyon         |
| 9316             | 33.9953            | -118.6328           | -65.55        | 2-Offshore    | Santa Monica Bay    |
| 9319             | 33.9974            | -118.4918           | -9.76         | Inner Shelf   | Santa Monica Bay    |
| 9326             | 34.0051            | -118.7666           | -40.59        | Mid Shelf     | Santa Monica Bay    |
| 9331             | 34.0132            | -118.6702           | -45.21        | Mid Shelf     | Santa Monica Bay    |
| 9336             | 34.0195            | -118.743            | -23.96        | Inner Shelf   | Santa Monica Bay    |
| 9341             | 34.0232            | -118.5928           | -24.04        | Inner Shelf   | Santa Monica Bay    |

Dec Deg: Decimal degree; GIS: geographic information systems

# Examining the correlation between quantifiable SVOCs and organic carbon content or particulate size in benthic sediments as a function of ocean stratum

Ochan Otim\*

*Environmental Monitoring Division, City of Los Angeles, 12000 Vista Del Mar, Playa Del Rey, CA. 90293*

\* *Corresponding author* Tel.: +1 310 648 5835; fax: +1 310 648 5828. *E-mail address:* ochan.otim@lacity.org

Author ORCID: 0000-0001-7272-4356

KEYWORDS: DDT, PAH, PCB, sediments, particle size, Santa Monica Bay

**Supplemental Material Table S2.** The list of pollution indicators used in this study along with their MDLs (method detection limits in (( $\mu\text{g}/\text{kg}$  wet-weight)).

| PAHs                            | MDL | PCB congeners | MDL <sup>b</sup> | DDTs      | MDL <sup>b</sup> |
|---------------------------------|-----|---------------|------------------|-----------|------------------|
| Naphthalene                     | 7   | 18, 28        | 0.26, 0.23       | 2,4'-DDT  | 0.61             |
| 2-Methylnaphthalene             | 10  | 37, 44        | 0.47, 0.20       | 4,4'-DDT  | 0.67             |
| 1-Methylnaphthalene             | 9   | 49, 52        | 0.22, 0.21       | 2,4'-DDE  | 0.61             |
| Biphenyl                        | 8   | 66, 70        | 0.38, 0.22       | 4,4'-DDE  | 0.57             |
| 2,6-Dimethylnaphthalene         | 6   | 74, 77        | 0.23, 0.53       | 2,4'-DDD  | 0.73             |
| Acenaphthylene                  | 5   | 81, 87        | 0.44, 0.38       | 4,4'-DDD  | 0.71             |
| Acenaphthene                    | 4   | 99, 101       | 0.21, 0.22       | 4,4'-DDMU | 1.26             |
| 1,6,7-Trimethylnaphthalene      | 5   | 105, 110      | 0.45, 0.37       |           |                  |
| Fluorene                        | 5   | 114, 118      | 0.20, 0.19       |           |                  |
| Phenanthrene                    | 5   | 119, 123      | 0.38, 0.57       |           |                  |
| Anthracene                      | 5   | 126, 128      | 0.29, 0.24       |           |                  |
| 1-Methylphenanthrene            | 5   | 138, 149      | 0.20, 0.57       |           |                  |
| Fluoranthene                    | 6   | 151, 153      | 0.21, 0.37       |           |                  |
| Pyrene                          | 7   | 156, 157      | 0.34, 0.50       |           |                  |
| Benzo[ <i>a</i> ]anthracene     | 8   | 158, 167      | 0.19, 0.22       |           |                  |
| Chrysene                        | 6   | 168, 169      | 0.45, 0.34       |           |                  |
| Benzo[ <i>b</i> ]fluoranthene   | 7   | 170, 177      | 0.20, 0.25       |           |                  |
| Benzo[ <i>k</i> ]fluoranthene   | 8   | 180, 183      | 0.26, 0.26       |           |                  |
| Benzo[ <i>e</i> ]pyrene         | 7   | 187, 189      | 0.25, 0.24       |           |                  |
| Benzo[ <i>a</i> ]pyrene         | 7   | 194, 200      | 0.27, 0.76       |           |                  |
| Perylene                        | 5   | 201, 206      | 0.24, 0.29       |           |                  |
| Indeno[1,2,3- <i>cd</i> ]pyrene | 7   |               |                  |           |                  |
| Dibenz[ <i>a,h</i> ]anthracene  | 5   |               |                  |           |                  |
| Benzo[ <i>ghi</i> ]perylene     | 8   |               |                  |           |                  |

<sup>b</sup> MDLs were determined in fish tissue.
